# Supplementary material for: Why Is It Easier to Get Mad Than It Is to Feel Sad? Pilot Study of Regulation-Focused Psychotherapy for Children
Source: Atypon-hosted journal article supplement (doi:10.1176/appi.psychotherapy.20180027), 2019-02-21
Supplement: appi.psychotherapy.20180027.ds001.pdf [file appi.psychotherapy.20180027.ds001.pdf]

**Appendix 1. RFP-C Treatment Protocol**

| <i>Session</i> | <i>Description</i>                    | <i>Purpose</i>                                                                                                                                                                                                                                                                                                                                   |
|----------------|---------------------------------------|--------------------------------------------------------------------------------------------------------------------------------------------------------------------------------------------------------------------------------------------------------------------------------------------------------------------------------------------------|
| P1             | Introductory meeting with parent(s)   | <ul style="list-style-type: none"> <li>• Develop rapport with parent(s)/caregiver(s)</li> <li>• Review chief complaint(s)</li> <li>• Emphasize family &amp; child strengths</li> <li>• Review developmental and psychiatric history</li> <li>• Introduce RFP-C principles including triangle of conflict</li> </ul>                              |
| 1, 2           | Initial sessions with child           | <ul style="list-style-type: none"> <li>• Establish rapport with child</li> <li>• Note topics child avoids</li> <li>• Use combination of structured and unstructured techniques to assess child's defenses against uncomfortable or painful affect</li> </ul>                                                                                     |
| P2             | Second meeting with parent(s)         | <ul style="list-style-type: none"> <li>• Discuss basic case conceptualization with parent(s)/caregiver(s)</li> <li>• Emphasize child's strengths</li> <li>• Revisit triangle of conflict</li> <li>• Discuss meaning of behavior</li> <li>• Identify how to understand meaning of externalizing problems</li> </ul>                               |
| 3-12           | Ongoing treatment sessions with child | <ul style="list-style-type: none"> <li>• Maintain unstructured frame while insuring safety</li> <li>• Closely follow child's play and verbalizations</li> <li>• Observe/notice child's attempts to avoid disturbing emotions</li> <li>• Address how avoidance is experienced in the treatment</li> </ul>                                         |
| P3             | Additional parent meeting             | <ul style="list-style-type: none"> <li>• Reintroduce triangle of conflict</li> <li>• Provide information about child's progress</li> <li>• Help parent(s)/caregiver(s) activate their own scaffolding framework for helping the child cope with distressing emotions</li> </ul>                                                                  |
| 13-16          | Emphasis on termination               | <ul style="list-style-type: none"> <li>• Utilize upcoming separation as a tool for working on feelings of loss or rejection</li> <li>• Discuss gains the child has made</li> <li>• Notice more adaptive ways of coping with distressing emotions</li> </ul>                                                                                      |
| P4             | Final parent meeting                  | <ul style="list-style-type: none"> <li>• Help parent(s)/caregiver(s) think about termination as a tool for the child to address difficult feelings</li> <li>• Summarize progress made</li> <li>• Emphasize family and child strengths</li> <li>• In non-research setting, leave open door for family to return to treatment if needed</li> </ul> |
